# Supplementary material
Source: MDPI journal article supplement (https://www.mdpi.com/2304-6740/12/3/92)
Supplement: s1 [file s1]

Supporting information for

**Lithium Salt of 2,5-Bis(trimethylsilyl)Stannolyl Anion: Synthesis, Structure, and Nonaromatic Character**

Kohei Kitamura <sup>1</sup>, Youichi Ishii <sup>1</sup> and Takuya Kuwabara <sup>2,\*</sup>

<sup>1</sup>Department of Applied Chemistry, Faculty of Science and Engineering, Chuo University, 1-13-27, Kasuga,  
Bunkyo-ku, Tokyo 112-8551, Japan

<sup>2</sup>Department of Chemistry and Biochemistry, Graduate School of Humanities and Sciences, Ochanomizu  
University, 2-1-1, Otsuka, Bunkyo-ku, Tokyo 112-8610, Japan

Table of contents

|                                                                            |      |
|----------------------------------------------------------------------------|------|
| 1. Packing structure of <b>2</b>                                           | S1   |
| 2. X-ray crystallographic data for <b>2</b> and <b>3·(thf)<sub>3</sub></b> | S2   |
| 3. NMR spectra for <b>1</b> , <b>2</b> , and <b>3·thf</b>                  | S3–9 |

1. Packing structure of **2**

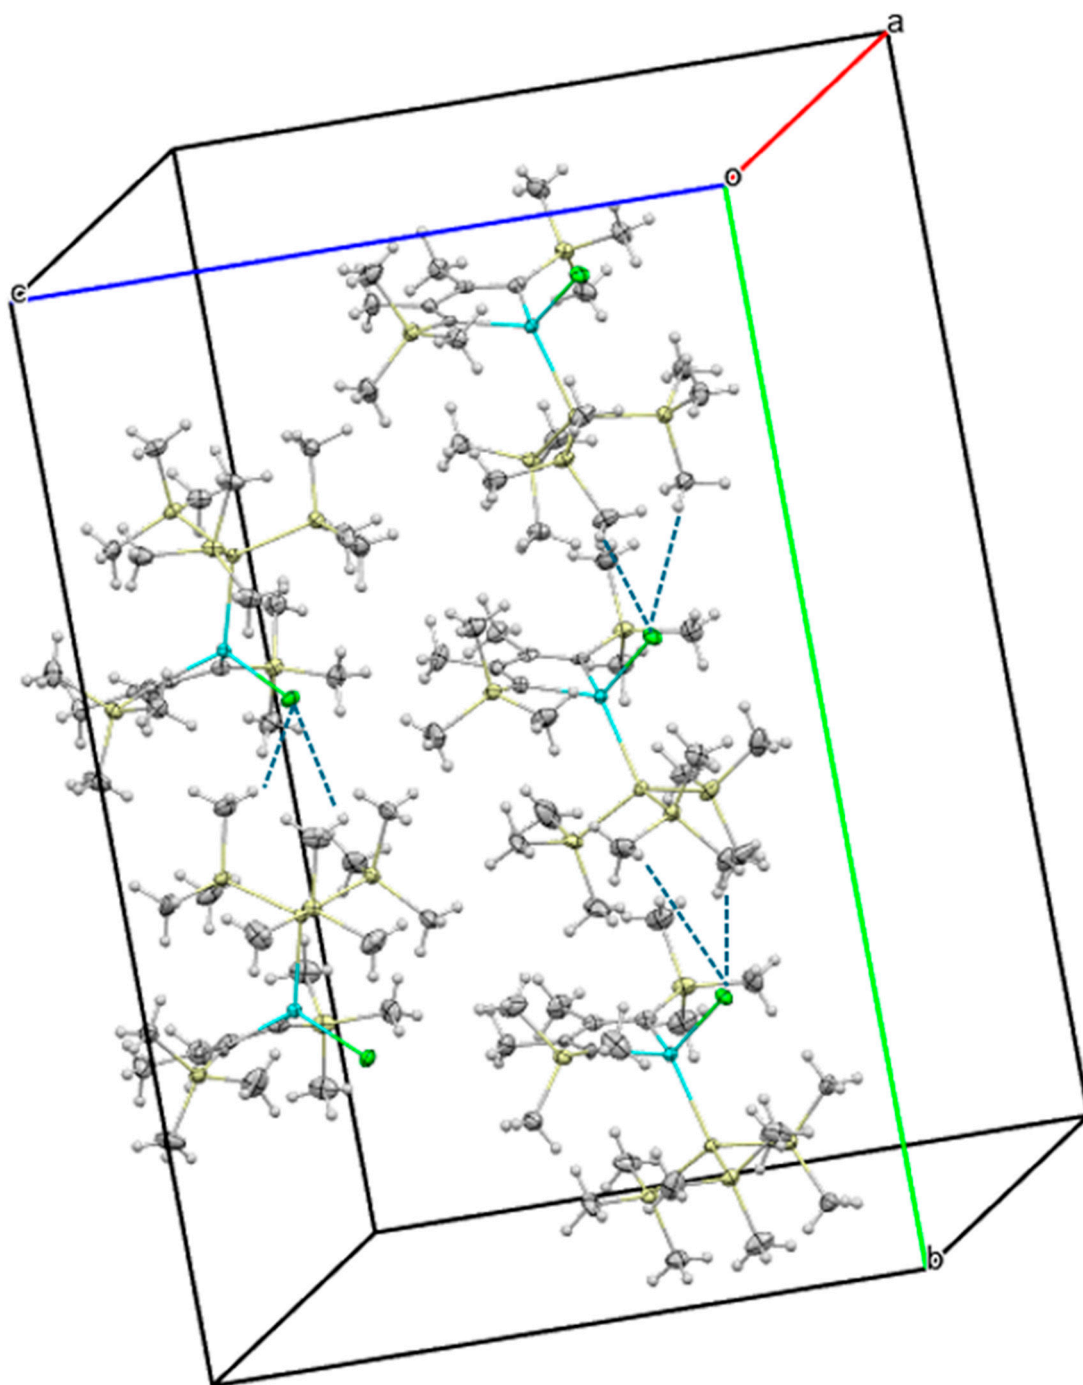

**Figure S1.** Packing structure of **2**. CH...Cl bonds are shown by blue broken lines.

## 2. X-ray crystallographic data for **2** and **3·(thf)<sub>3</sub>**

**Table S1.** Crystallographic data for **2** and **3·(thf)<sub>3</sub>**.

|                                                                 | <b>2</b>                                             | <b>3·(thf)<sub>3</sub></b>                                           |
|-----------------------------------------------------------------|------------------------------------------------------|----------------------------------------------------------------------|
| CCDC                                                            | 2337714                                              | 2337715                                                              |
| formula                                                         | C <sub>21</sub> H <sub>51</sub> ClSi <sub>6</sub> Sn | C <sub>33</sub> H <sub>75</sub> Li O <sub>3</sub> Si <sub>6</sub> Sn |
| Mw                                                              | 626.29                                               | 814.10                                                               |
| crystal dimension                                               | 0.25 × 0.15 × 0.15                                   | 0.14 × 0.13 × 0.10                                                   |
| crystal system                                                  | monoclinic                                           | monoclinic                                                           |
| space group                                                     | <i>P</i> 2 <sub>1</sub> / <i>c</i>                   | <i>P</i> 2 <sub>1</sub> / <i>n</i>                                   |
| <i>a</i> [Å]                                                    | 18.826(2)                                            | 13.3363(11)                                                          |
| <i>b</i> [Å]                                                    | 28.856(3)                                            | 19.6417(18)                                                          |
| <i>c</i> [Å]                                                    | 18.810(2)                                            | 17.7954(16)                                                          |
| $\alpha$ [deg]                                                  | 90                                                   | 90                                                                   |
| $\beta$ [deg]                                                   | 97.7770(10)                                          | 91.4530(10)                                                          |
| $\gamma$ [deg]                                                  | 90                                                   | 90                                                                   |
| <i>V</i> [Å <sup>3</sup> ]                                      | 10124.5(19)                                          | 4660.0(7)                                                            |
| <i>Z</i>                                                        | 12                                                   | 4                                                                    |
| $\rho_{\text{calcd}}$ [g cm <sup>-3</sup> ]                     | 1.233                                                | 1.16                                                                 |
| <i>F</i> (000)                                                  | 3936                                                 | 1736                                                                 |
| $\mu$ [cm <sup>-1</sup> ]                                       | 10.57                                                | 7.29                                                                 |
| transmission factors                                            | 0.947 – 0.9694                                       | 0.8623 – 1                                                           |
| range                                                           |                                                      |                                                                      |
| index range                                                     | -24 ≤ <i>h</i> ≤ 24                                  | -17 ≤ <i>h</i> ≤ 13                                                  |
|                                                                 | -35 ≤ <i>k</i> ≤ 37                                  | -24 ≤ <i>k</i> ≤ 25                                                  |
|                                                                 | -24 ≤ <i>l</i> ≤ 19                                  | -23 ≤ <i>l</i> ≤ 23                                                  |
| no. reflections                                                 | 82916                                                | 37674                                                                |
| unique ( <i>R<sub>int</sub></i> )                               | 23037 (0.0729)                                       | 10667 (0.0437)                                                       |
| <i>I</i> > 2σ( <i>I</i> )                                       | 18698                                                | 8924                                                                 |
| no. parameters                                                  | 1243                                                 | 452                                                                  |
| <i>R</i> <sub>1</sub> ( <i>I</i> > 2σ( <i>I</i> )) <sup>a</sup> | 0.0619                                               | 0.0437                                                               |
| <i>wR</i> <sub>2</sub> (all data) <sup>b</sup>                  | 0.1272                                               | 0.0952                                                               |
| GOF <sup>c</sup>                                                | 1.121                                                | 1.103                                                                |
| max diff peak                                                   | 1.073/–1.01                                          | 1.155/–0.849                                                         |
| / hole [e Å <sup>-3</sup> ]                                     |                                                      |                                                                      |

<sup>a</sup>  $R1 = \sum ||F_o| - |F_c|| / \sum |F_o|$ . <sup>b</sup>  $wR2 = [\sum \{w(F_o^2 - F_c^2)^2\} / \sum w(F_o^2)^2]^{1/2}$ ,  $w = 1 / [^2F_o^2 + (aP)^2 + bP]$  (*a* and *b* are constants suggested by the refinement program;  $P = [\max(F_o^2, 0) + 2F_c^2] / 3$ ). <sup>c</sup>  $GOF = [\sum w(F_o^2 - F_c^2)^2 / (N_{\text{obs}} - N_{\text{params}})]^{1/2}$ .

3. NMR spectra of **1**, **2**, and **3**·(thf)

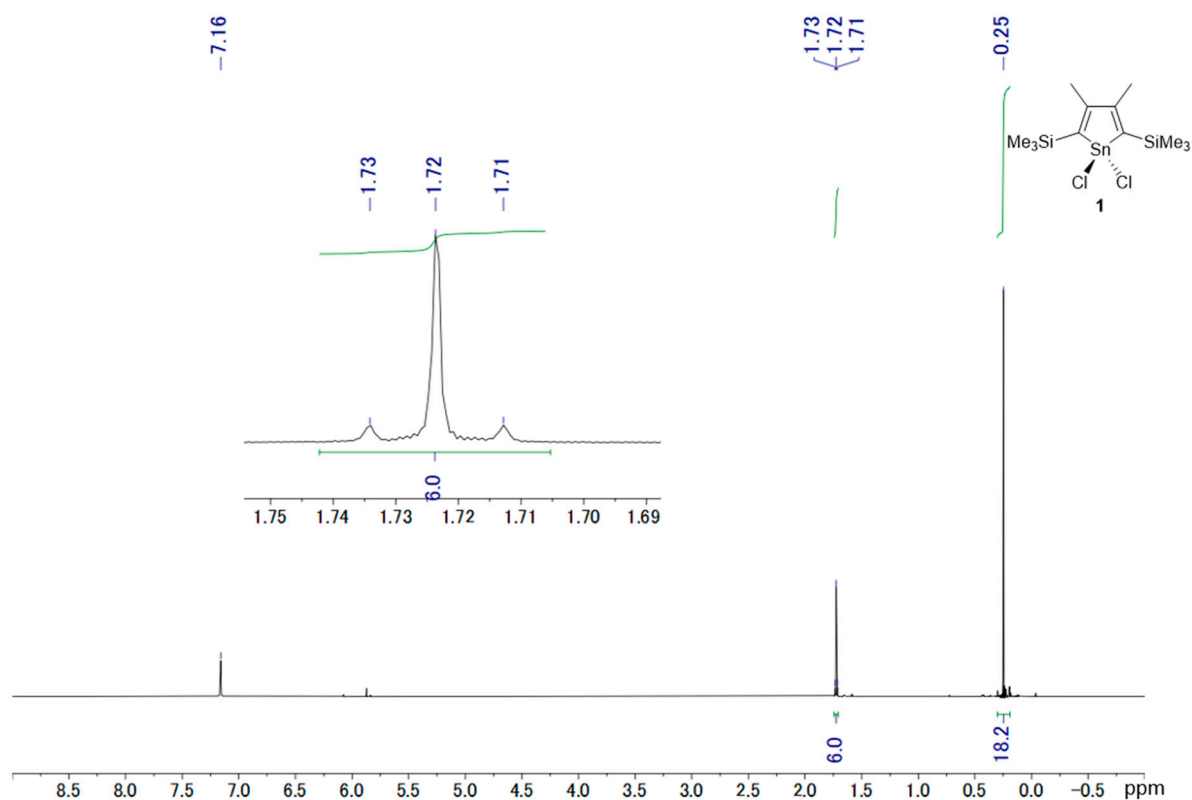

Figure S2. <sup>1</sup>H NMR spectrum of **1** (500 MHz, C<sub>6</sub>D<sub>6</sub>).

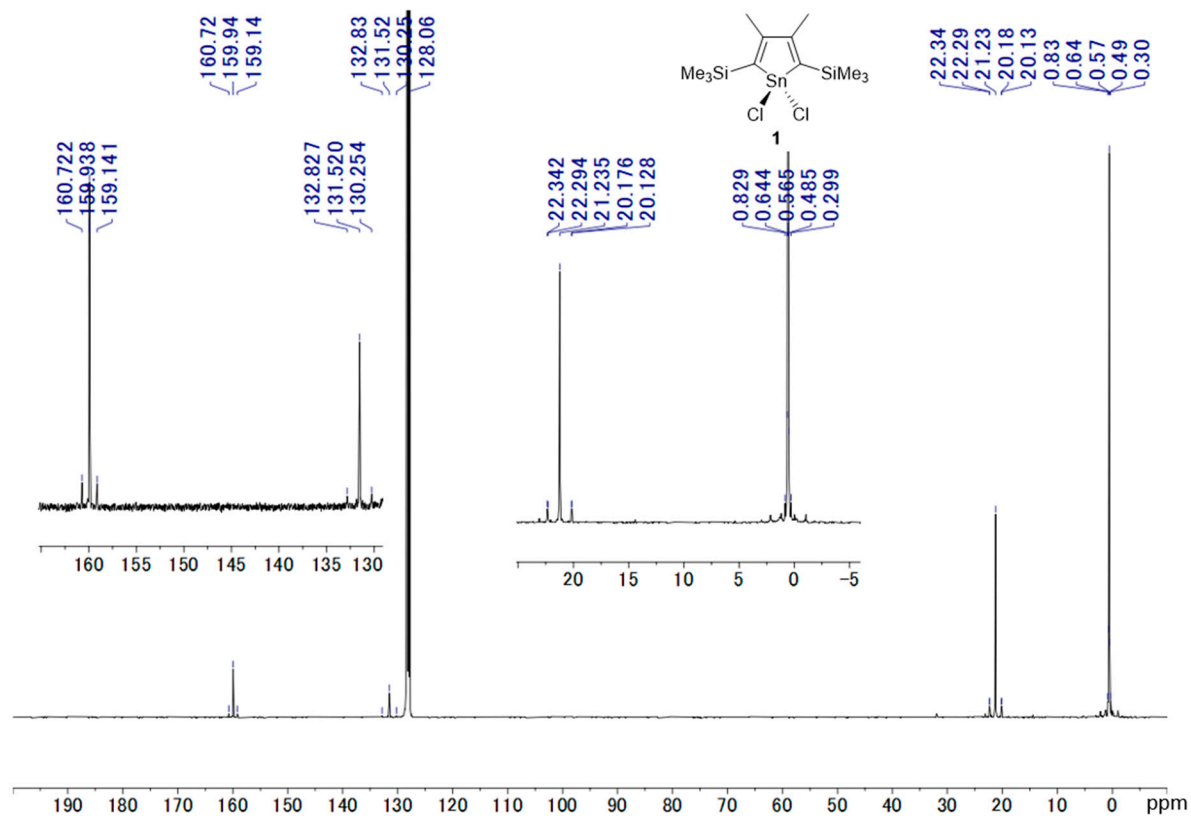

Figure S3. <sup>13</sup>C{<sup>1</sup>H} NMR spectrum of **1** (100 MHz, C<sub>6</sub>D<sub>6</sub>).

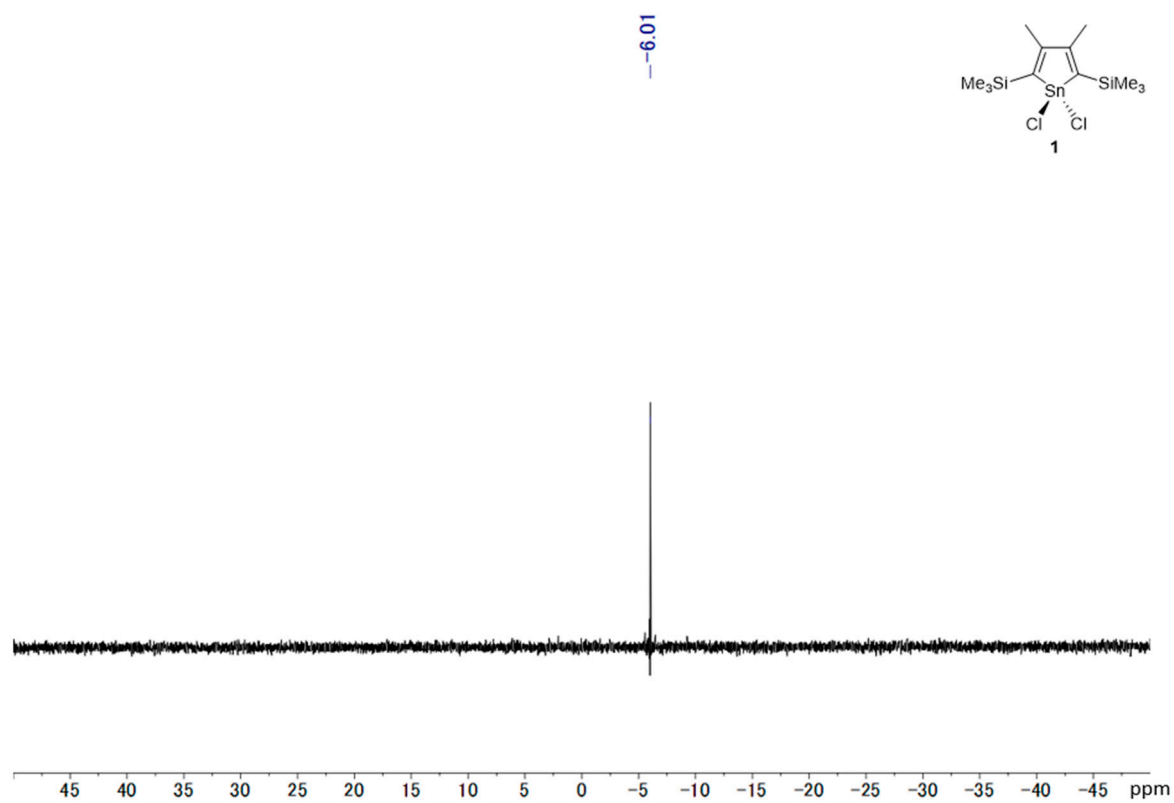

Figure S4. <sup>29</sup>Si{<sup>1</sup>H} NMR spectrum of **1** (99 MHz, CDCl<sub>3</sub>).

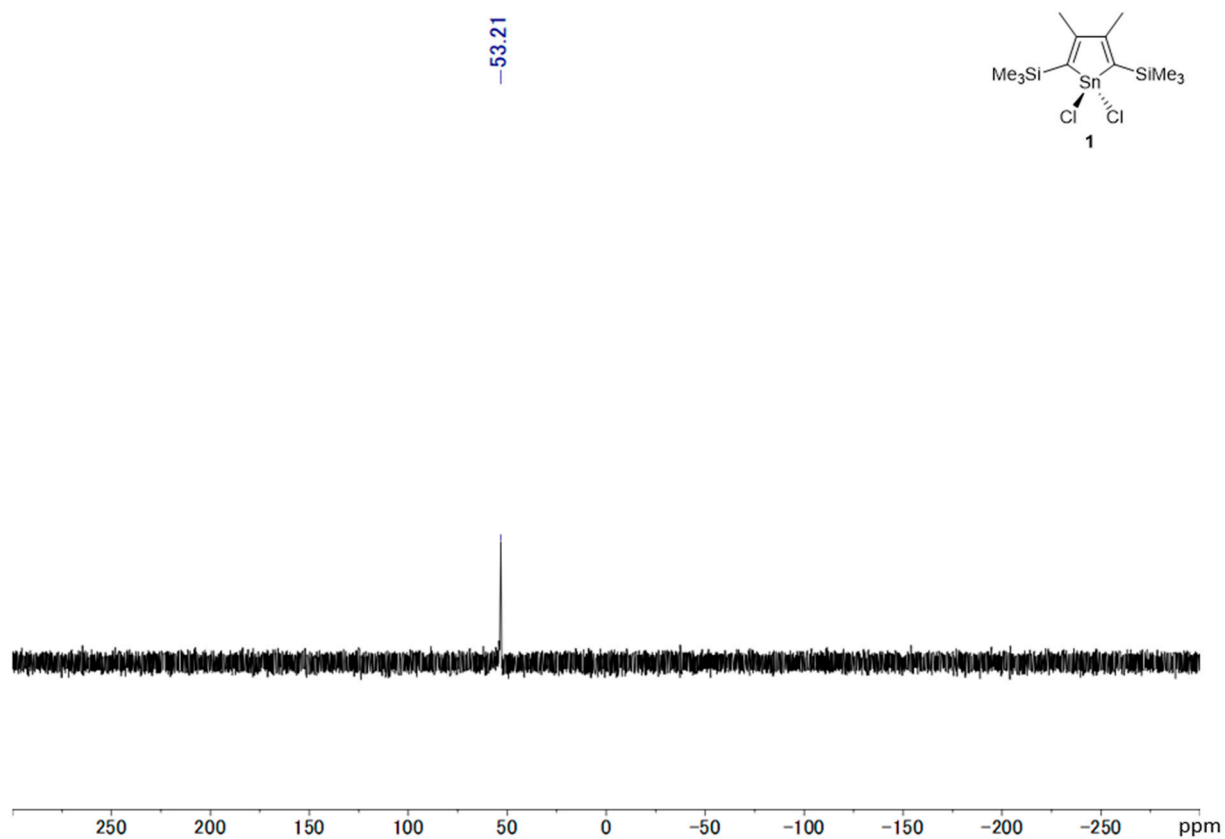

Figure S5. <sup>119</sup>Sn{<sup>1</sup>H} NMR spectrum of **1** (186 MHz, C<sub>6</sub>D<sub>6</sub>).

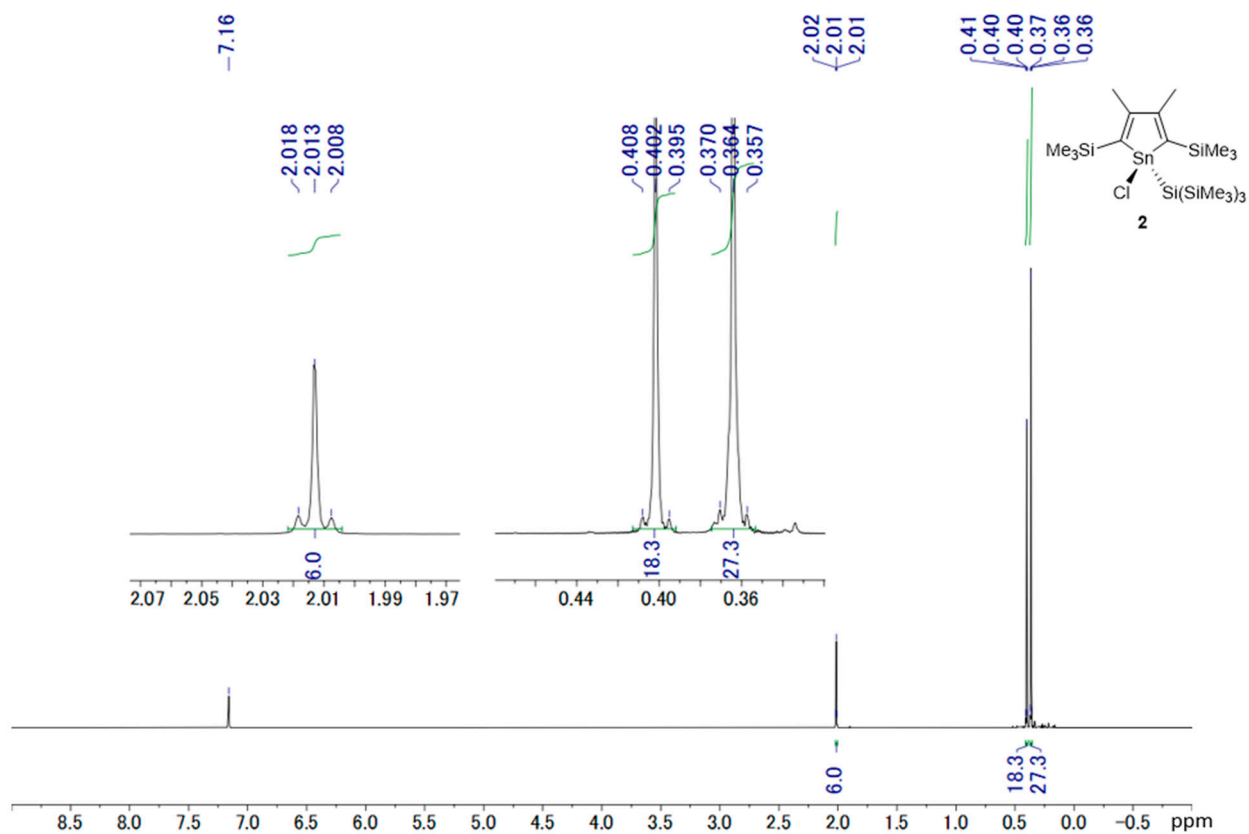

Figure S6. <sup>1</sup>H NMR spectrum of **2** (500 MHz, C<sub>6</sub>D<sub>6</sub>).

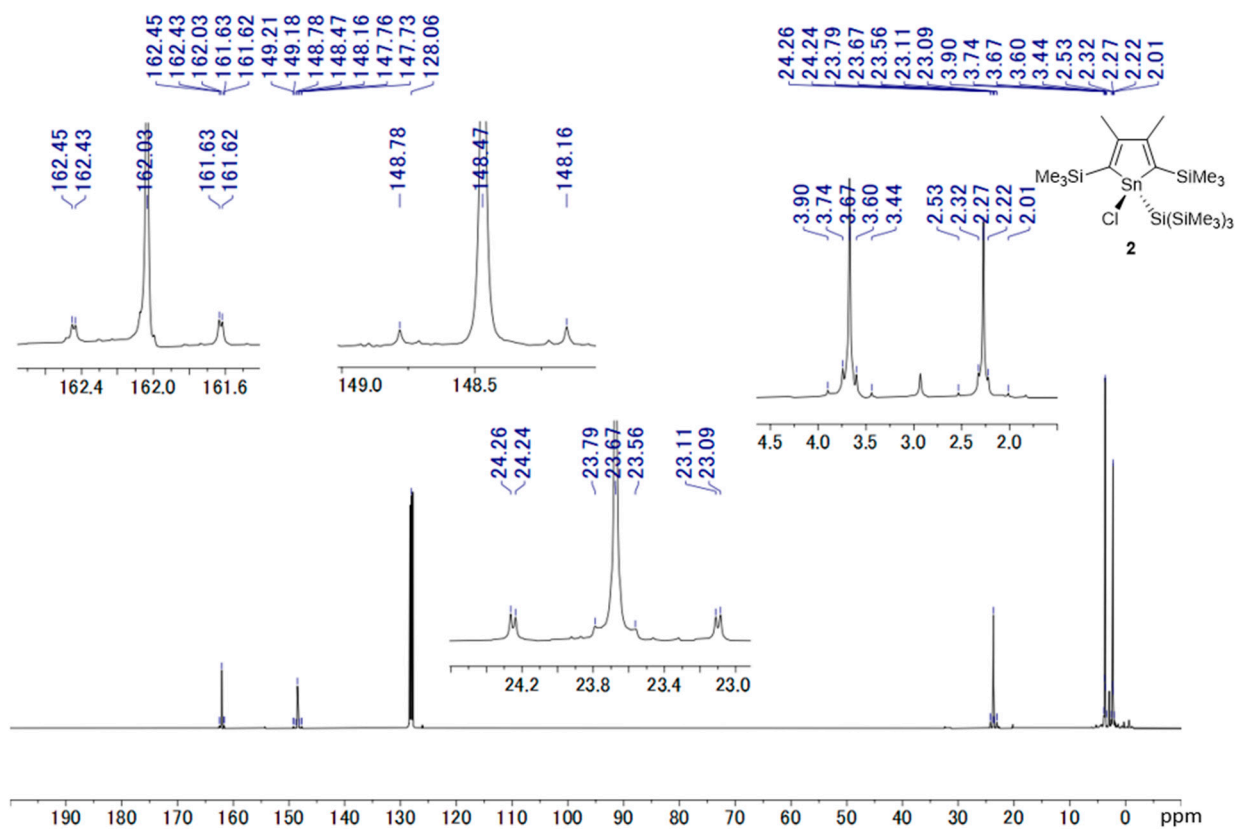

Figure S7. <sup>13</sup>C{<sup>1</sup>H} NMR spectrum of **2** (100 MHz, C<sub>6</sub>D<sub>6</sub>).

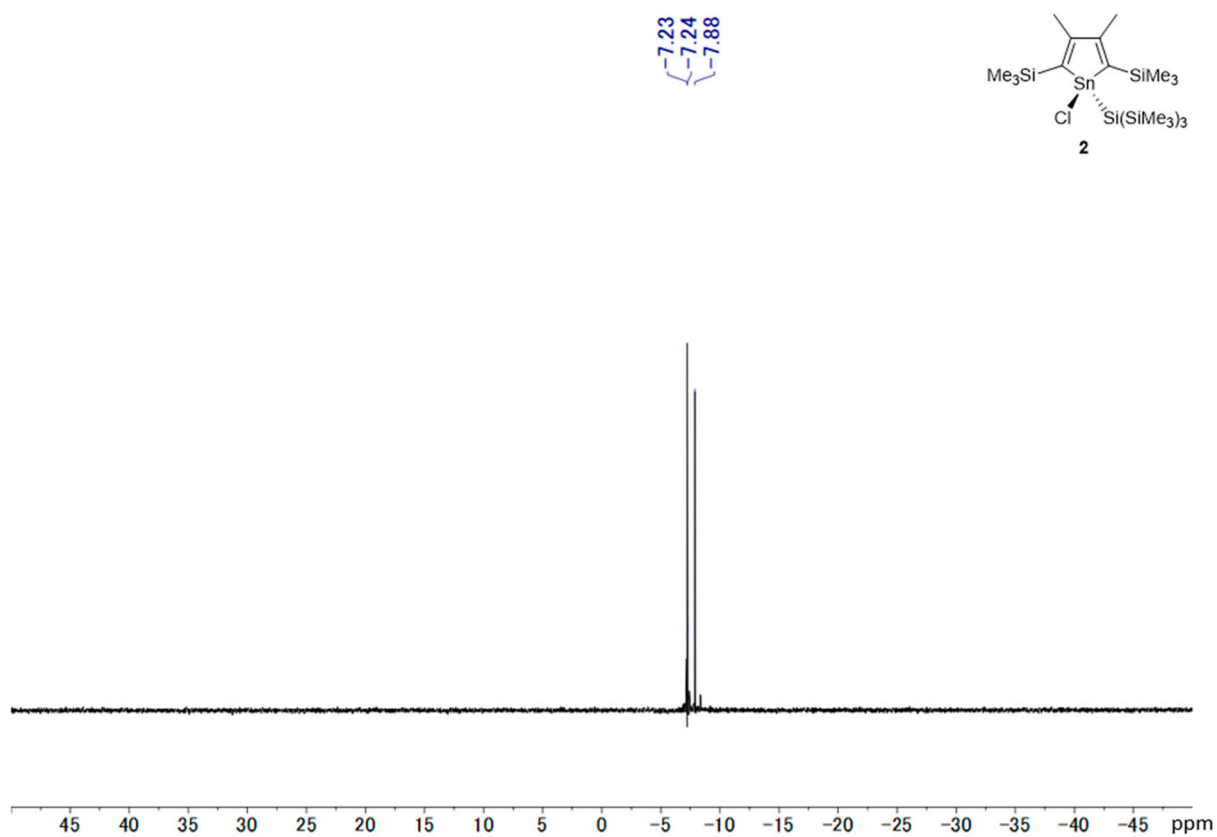

Figure S8. <sup>29</sup>Si{<sup>1</sup>H} NMR spectrum of **2** (99 MHz, CDCl<sub>3</sub>).

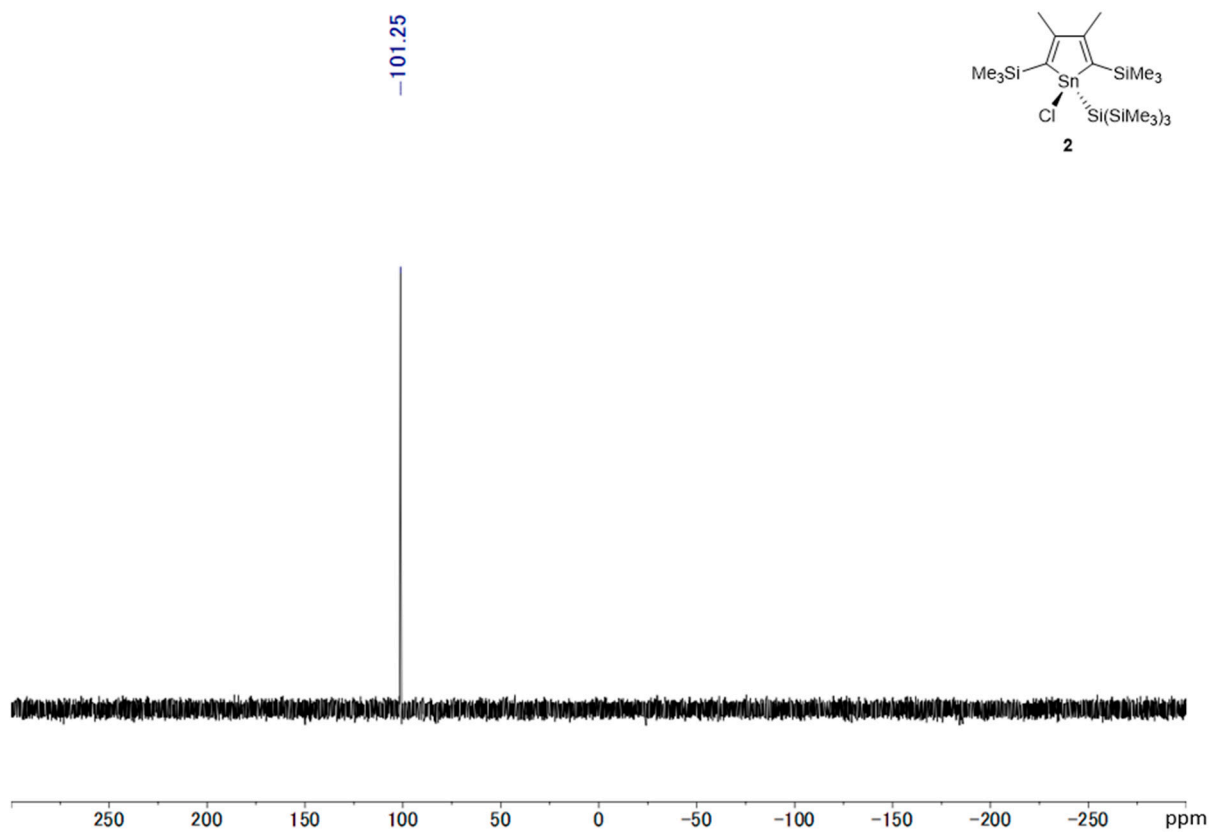

Figure S9. <sup>119</sup>Sn{<sup>1</sup>H} NMR spectrum of **2** (186 MHz, C<sub>6</sub>D<sub>6</sub>).

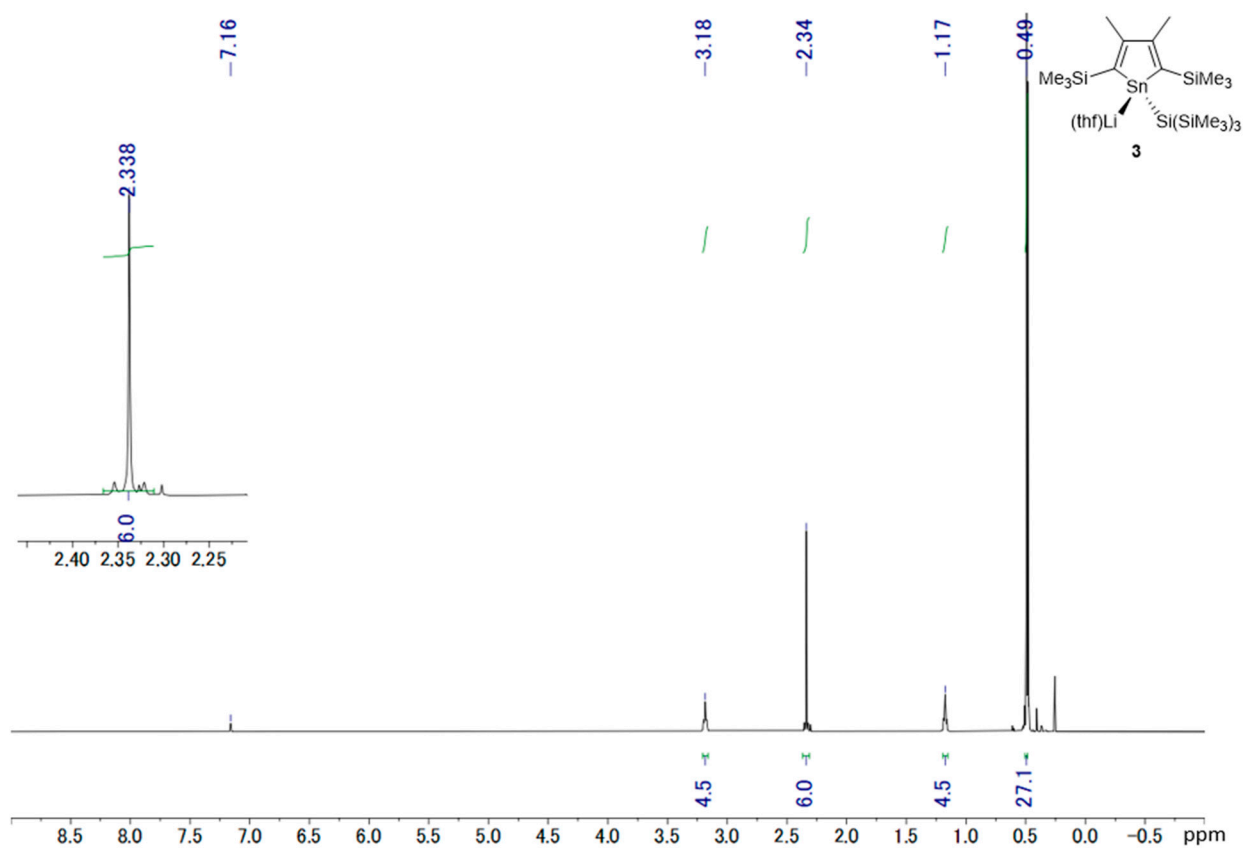

Figure S10. <sup>1</sup>H NMR spectrum of **3**·thf (500 MHz, C<sub>6</sub>D<sub>6</sub>).

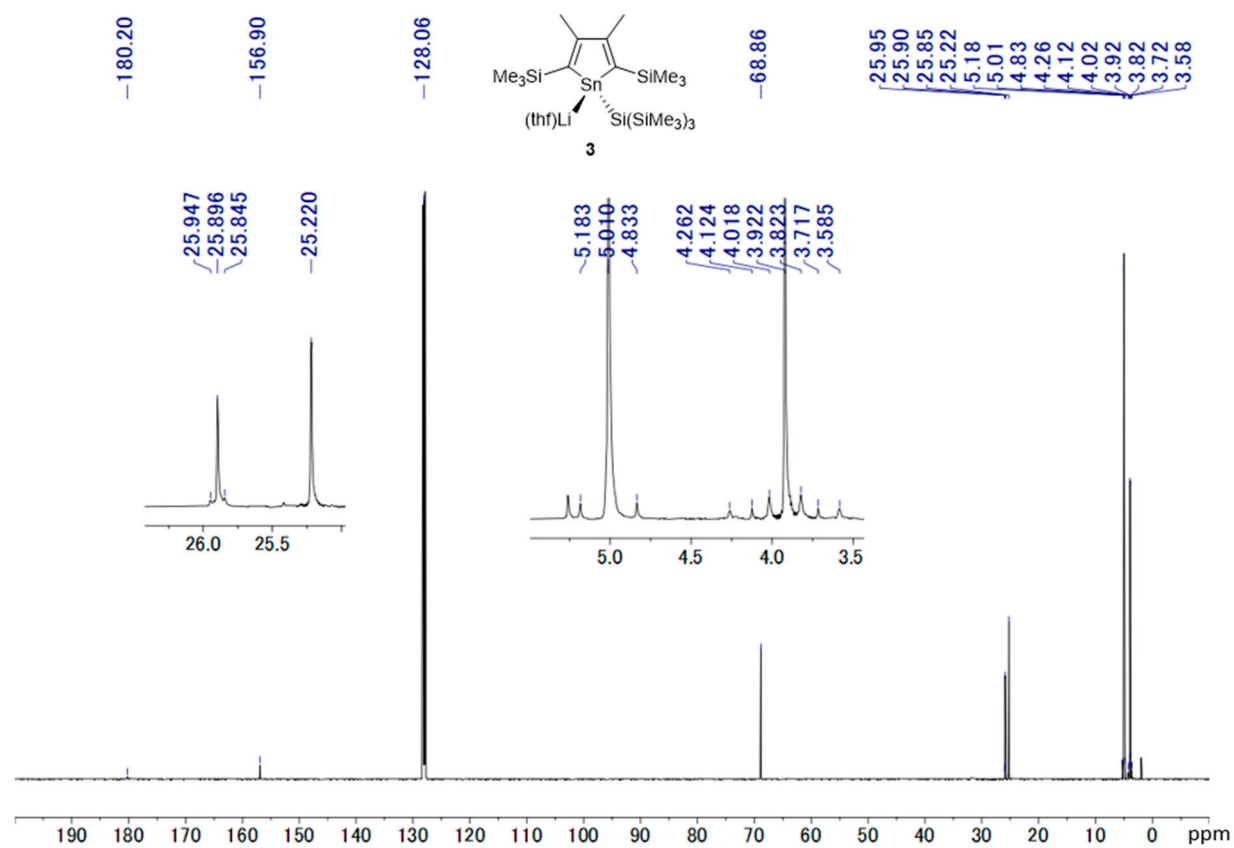

Figure S11. <sup>13</sup>C{<sup>1</sup>H} NMR spectrum of **3**·thf (125 MHz, C<sub>6</sub>D<sub>6</sub>).



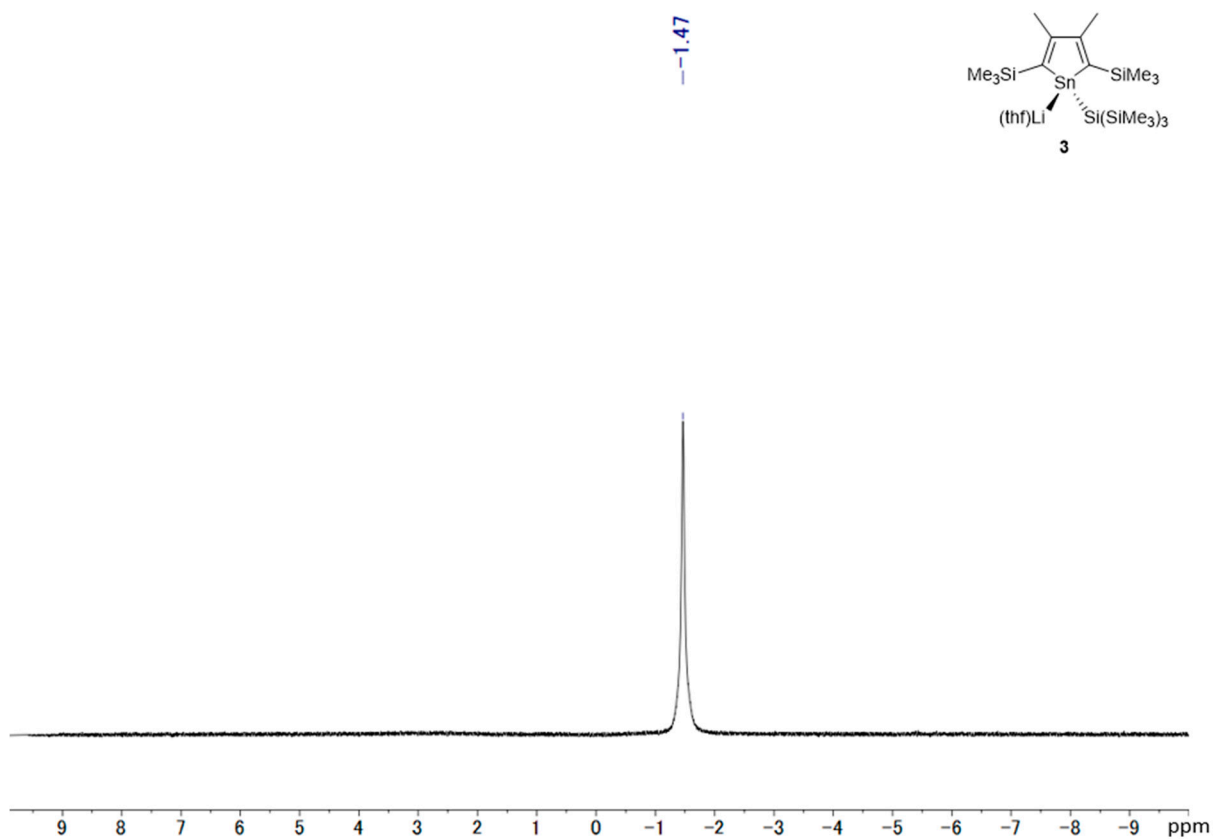

Figure S12.  ${}^7\text{Li}\{{}^1\text{H}\}$  NMR spectrum of **3**·thf (194 MHz, C<sub>6</sub>D<sub>6</sub>).

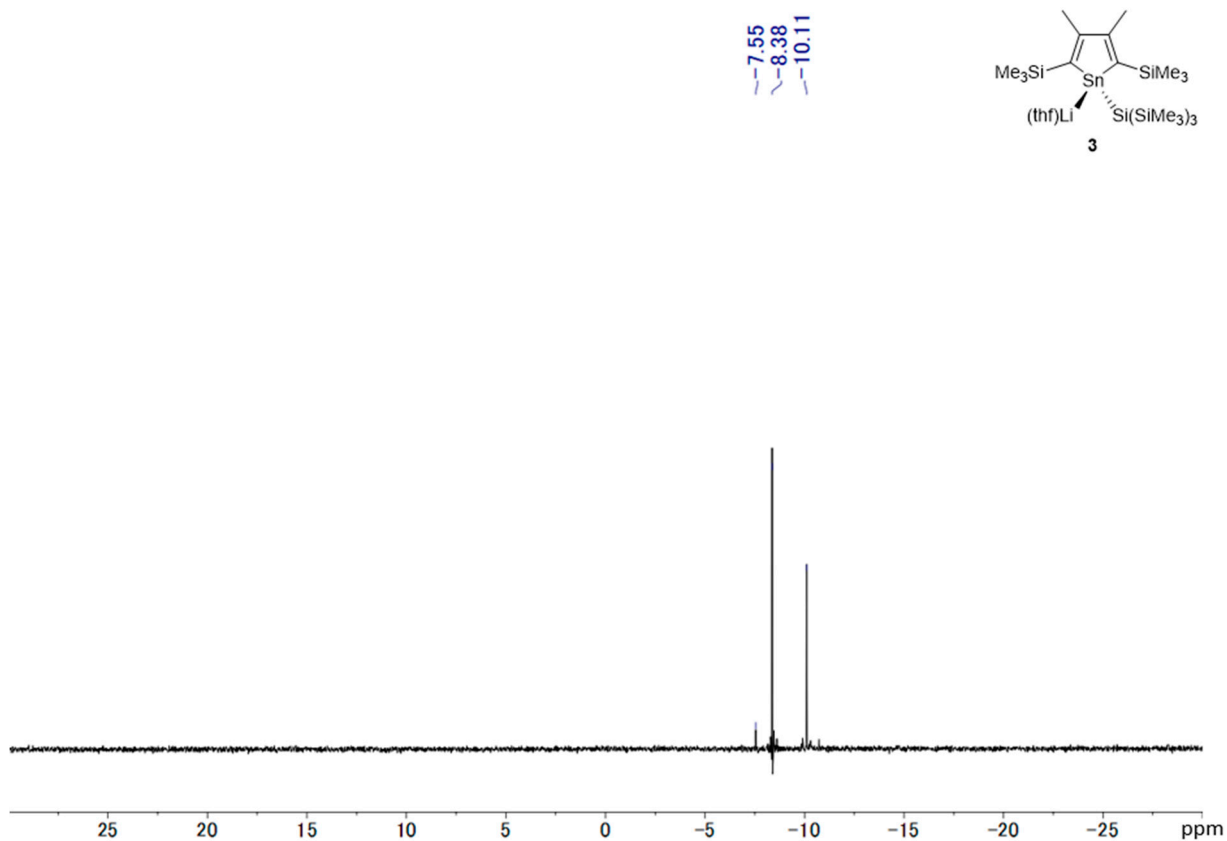

Figure S13.  ${}^{29}\text{Si}\{{}^1\text{H}\}$  NMR spectrum of **3**·thf (99 MHz, C<sub>6</sub>D<sub>6</sub>).

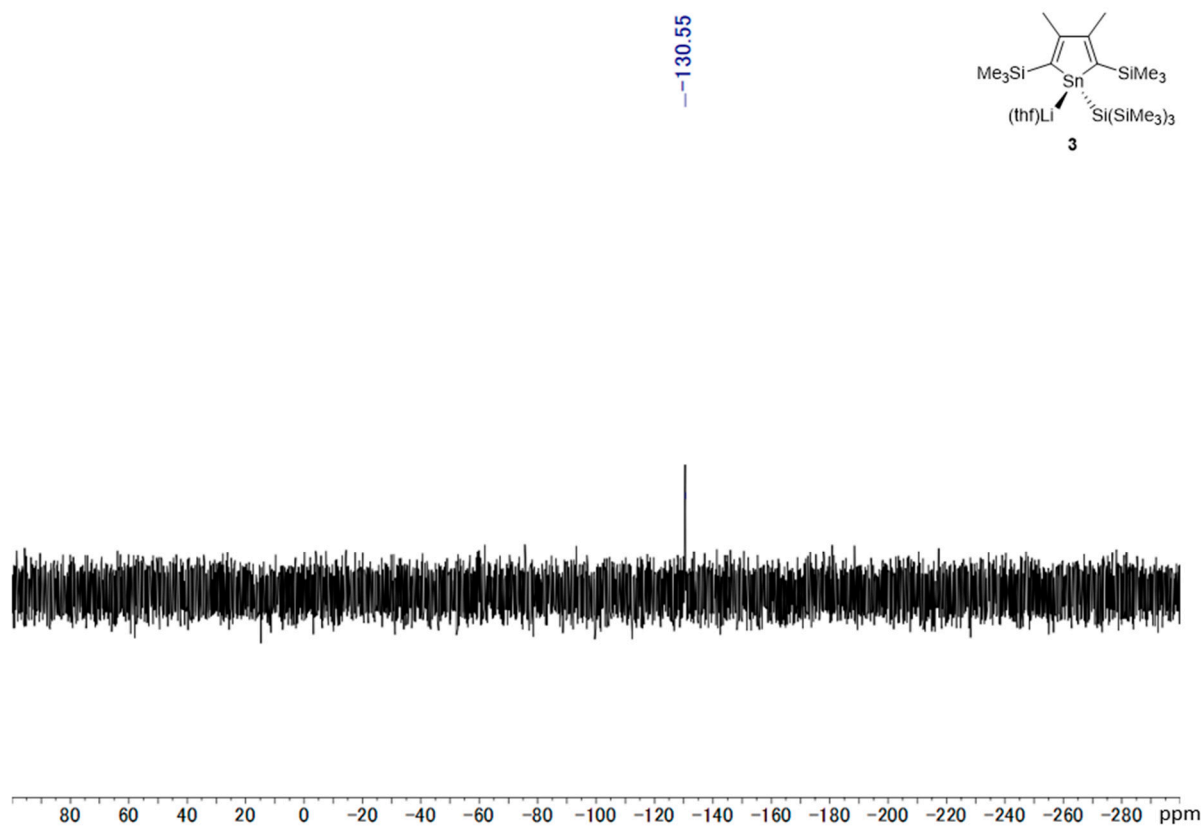

Figure S14.  $^{119}\text{Sn}\{^1\text{H}\}$  NMR spectrum of **3**·thf (186 MHz,  $\text{C}_6\text{D}_6$ ).
